# Supplementary material for: Cabazitaxel-Loaded Nanocarriers for Cancer Therapy with Reduced Side Effects
Source: PubMed Central journal article supplement (PMC6470818; doi:10.3390/pharmaceutics11030141), 2019-03-25
Supplement: pharmaceutics-11-00141-s001.pdf [file pharmaceutics-11-00141-s001.pdf]

# Supplementary Materials: Cabazitaxel-Loaded Nanocarriers for Cancer Therapy with Reduced Side Effects

Nagavendra Kommineni, Shaheen Mahira, Abraham J. Domb and Wahid Khan

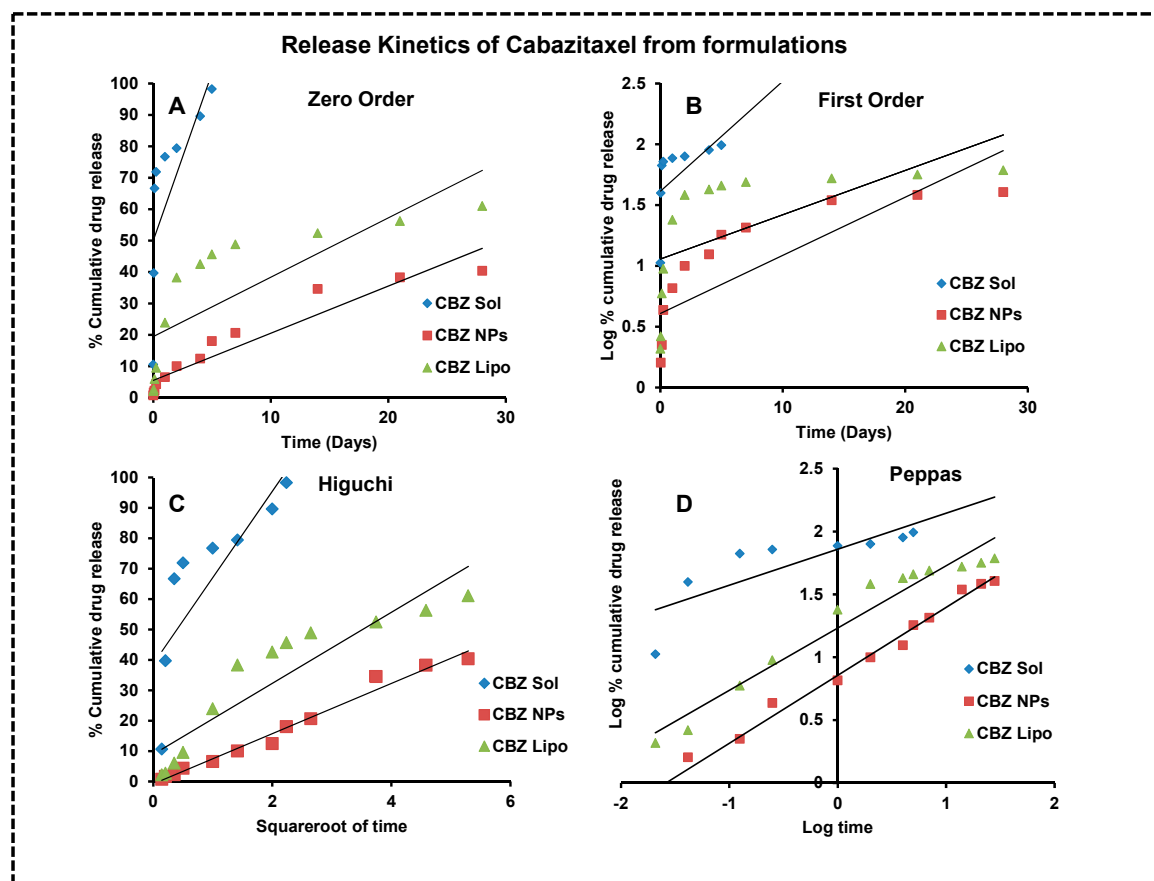

**Figure S1.** Cabazitaxel release kinetics from different formulations of CBZ Sol (cabazitaxel micellar solution), CBZ NPs (cabazitaxel nanoparticles), and CBZ Lipo (cabazitaxel liposomes): (A) zero-order model, (B) first-order model, (C) Higuchi model, and (D) Peppas model.
